# Supplementary material for: Field enhancement induced by surface defects in two-dimensional ReSe2 field emitters
Source: Royal Society of Chemistry journal article supplement (doi:10.1039/d4nr02109f), 2024-01-01

# **Field enhancement induced by surface defects in two-dimensional ReSe<sub>2</sub> field emitters.**

- **Data availability statement**

The data supporting this article have been included as part of the Supplementary Information.

# Figure S1

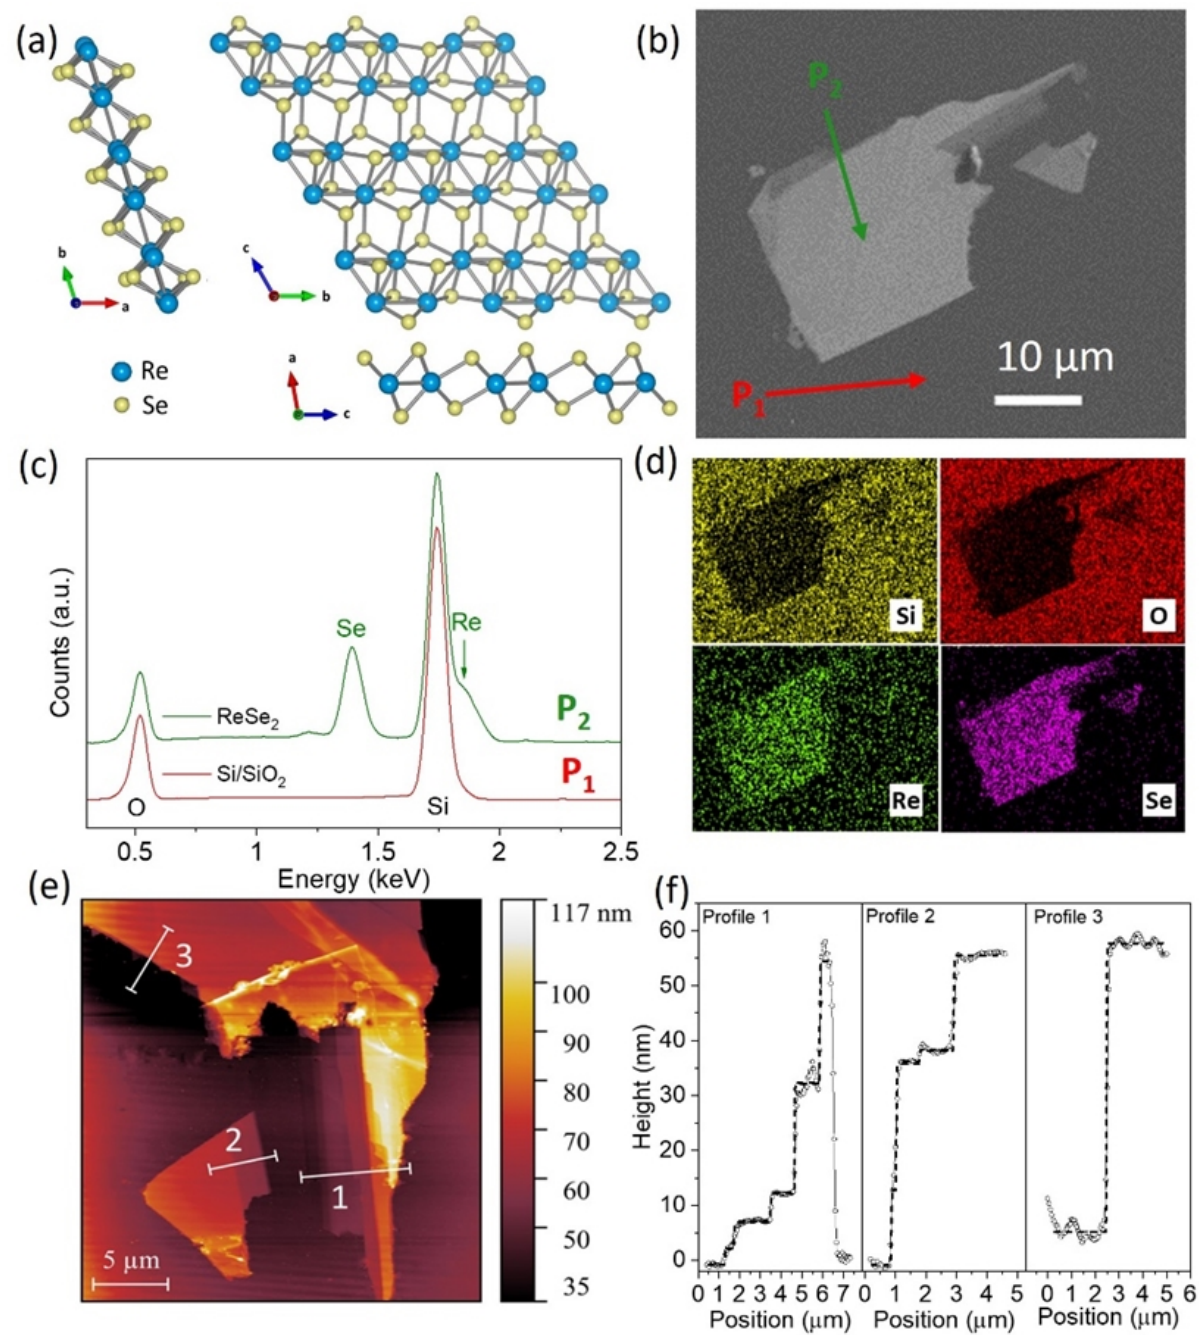

# Figure S2

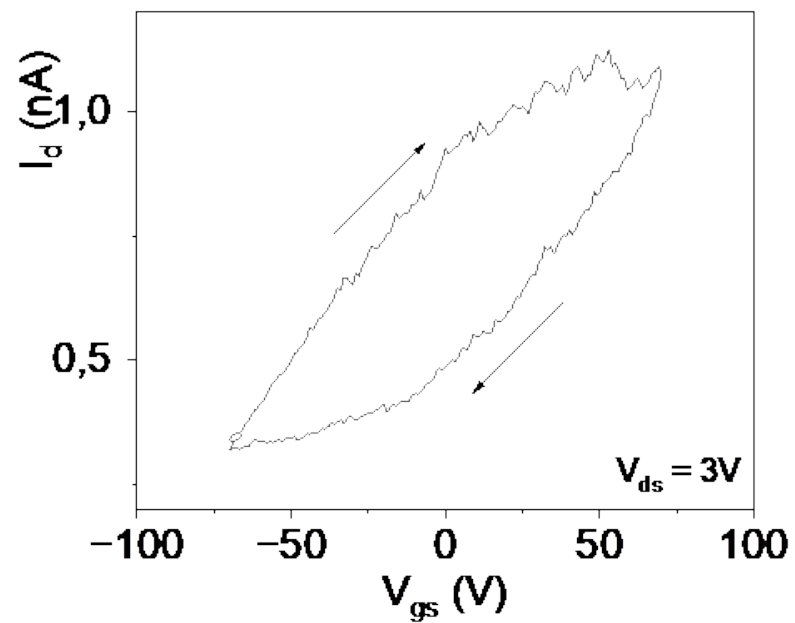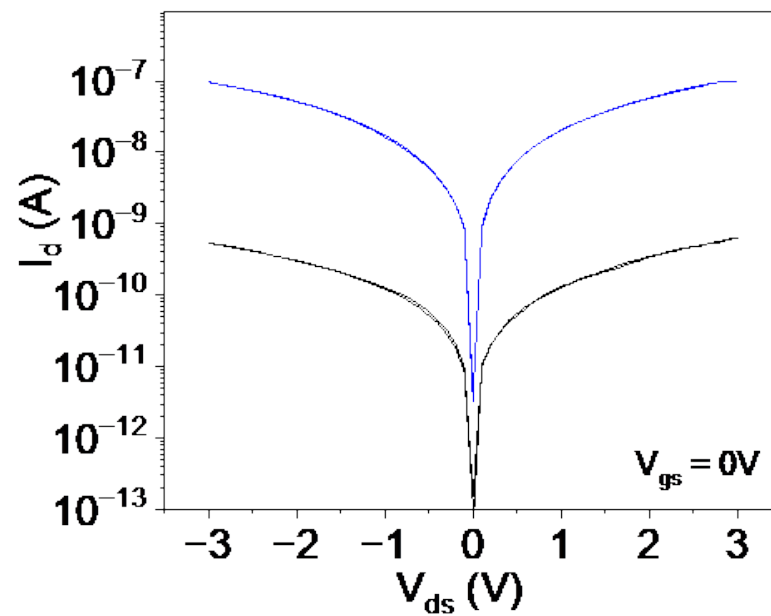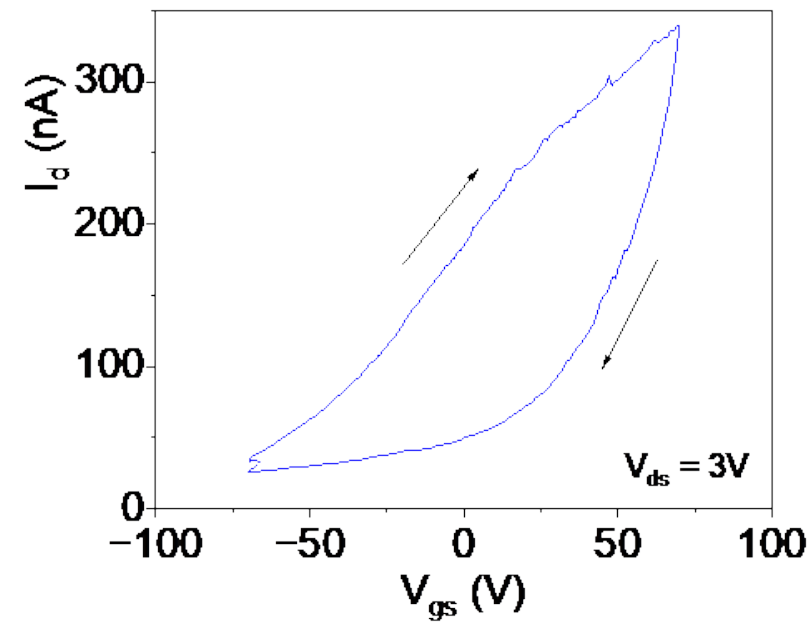

# Figure S3

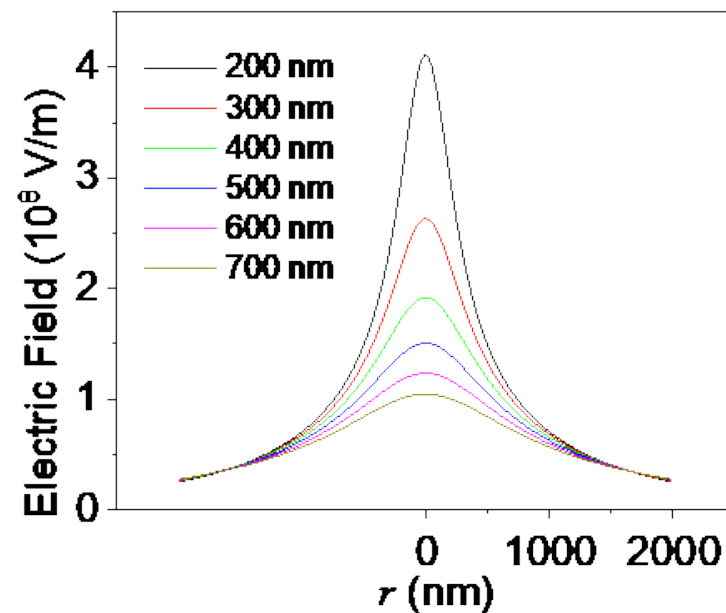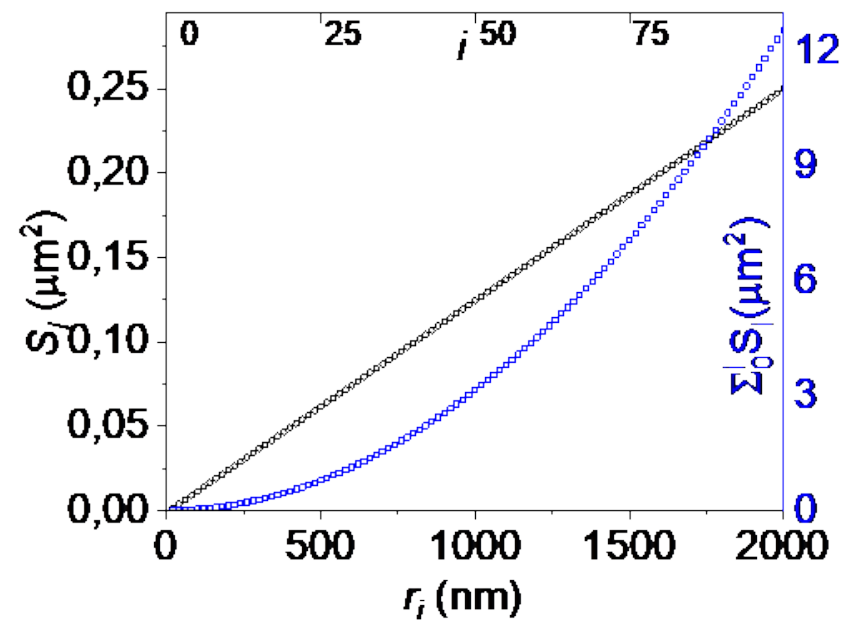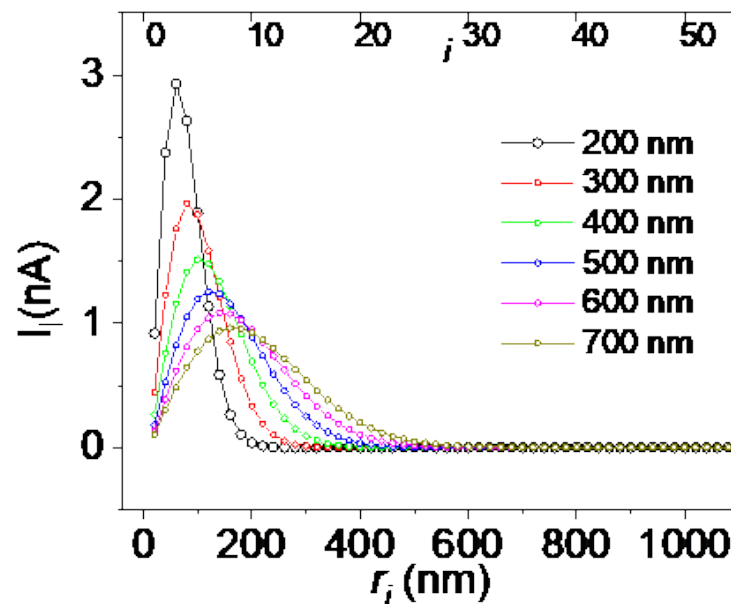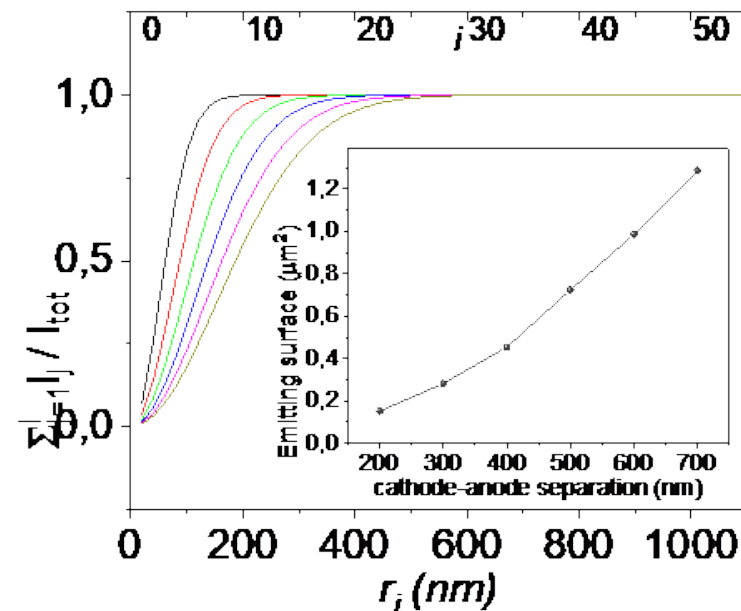

# Figure S4

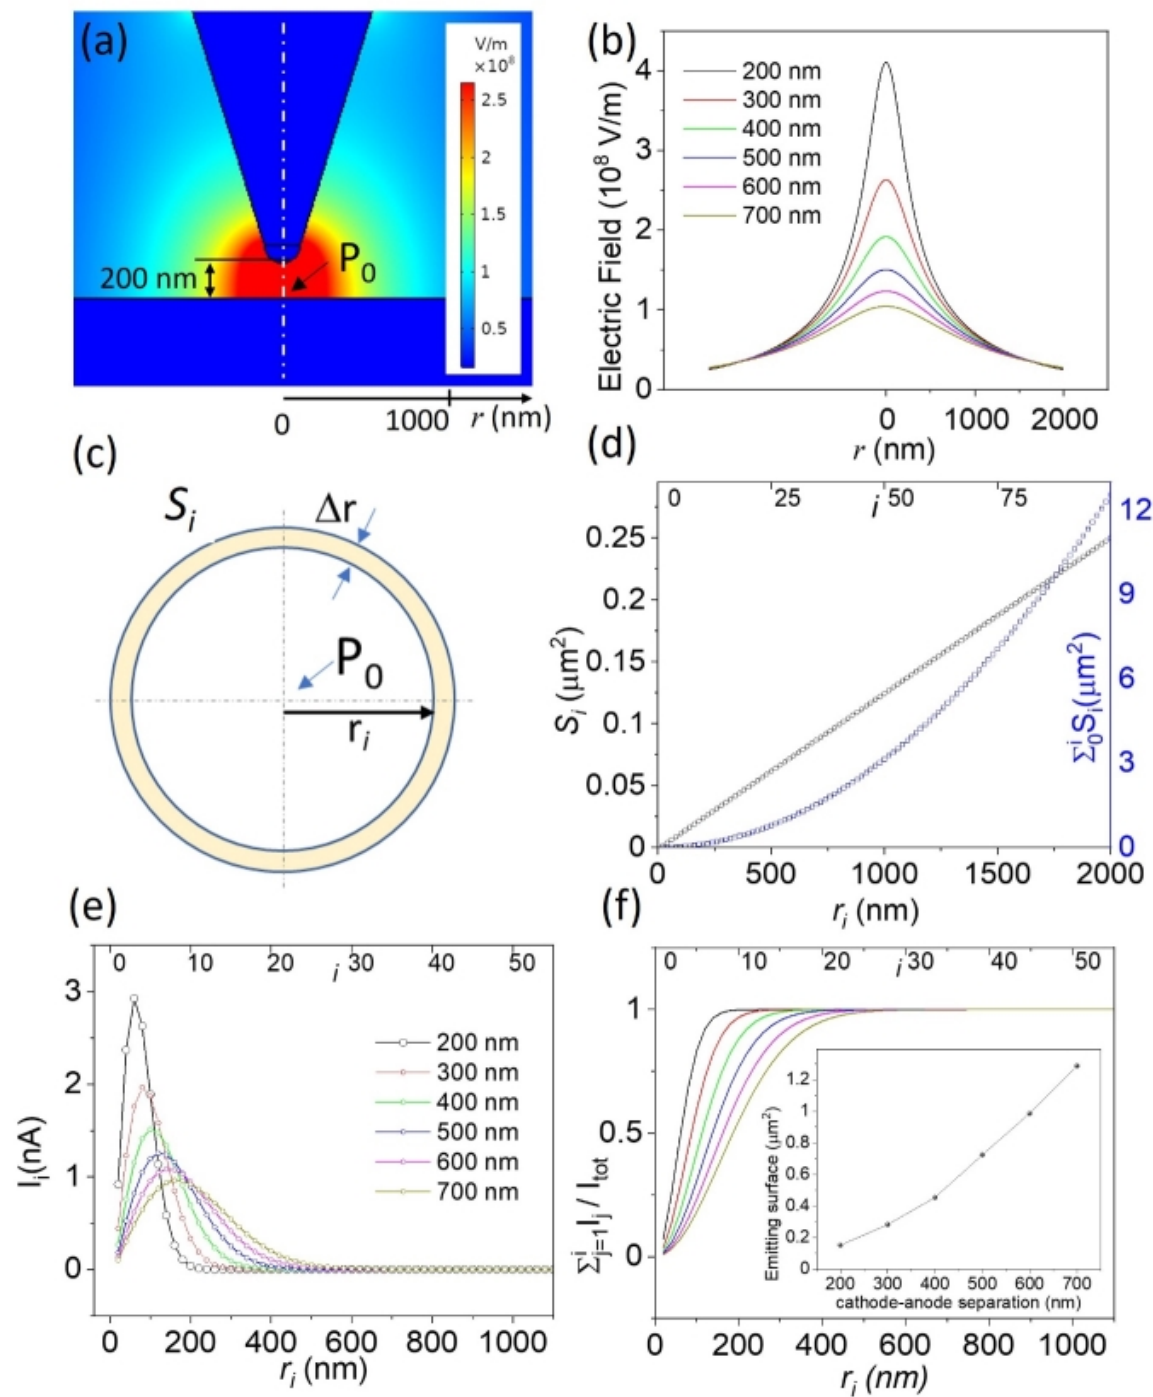

# Figure S5

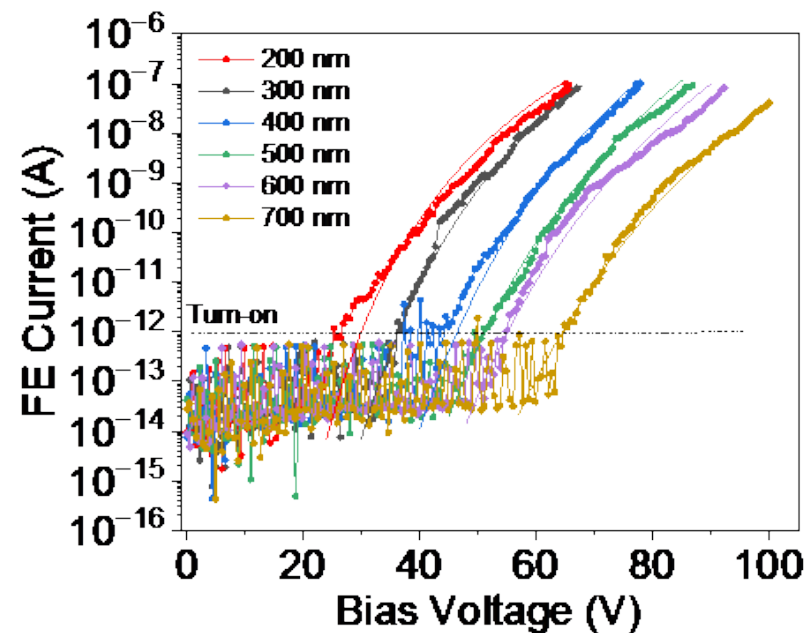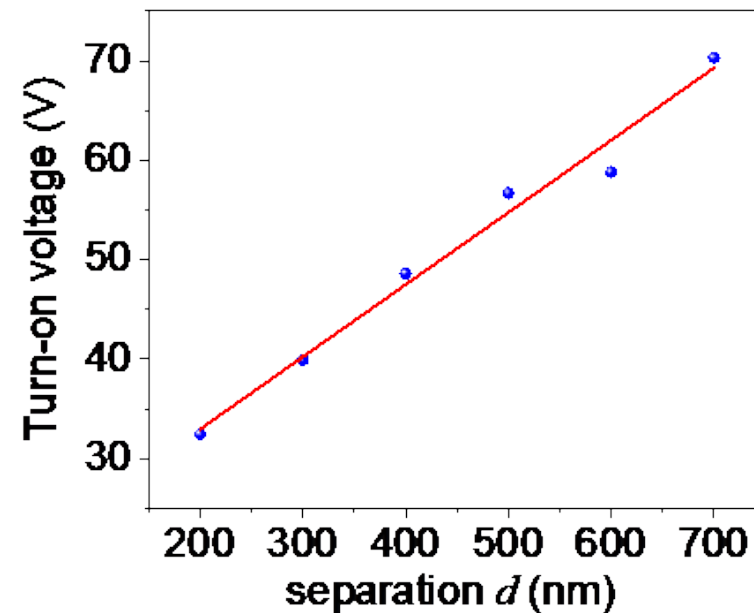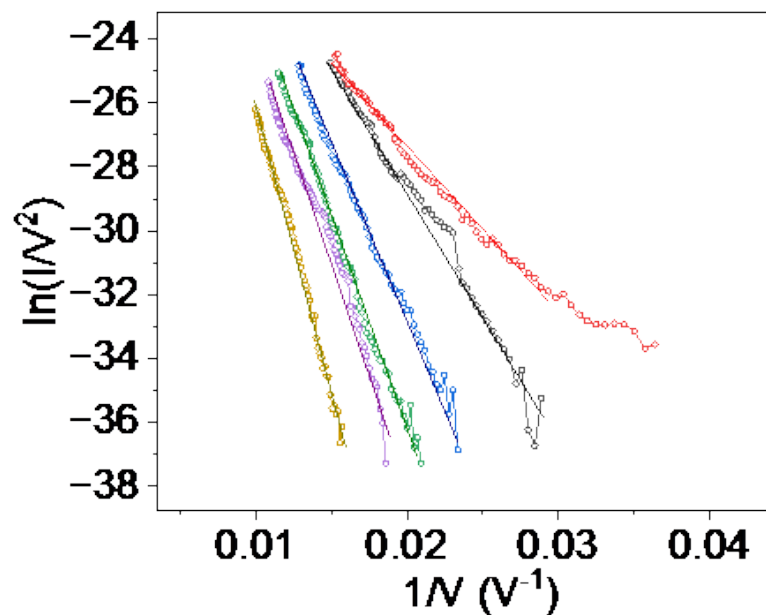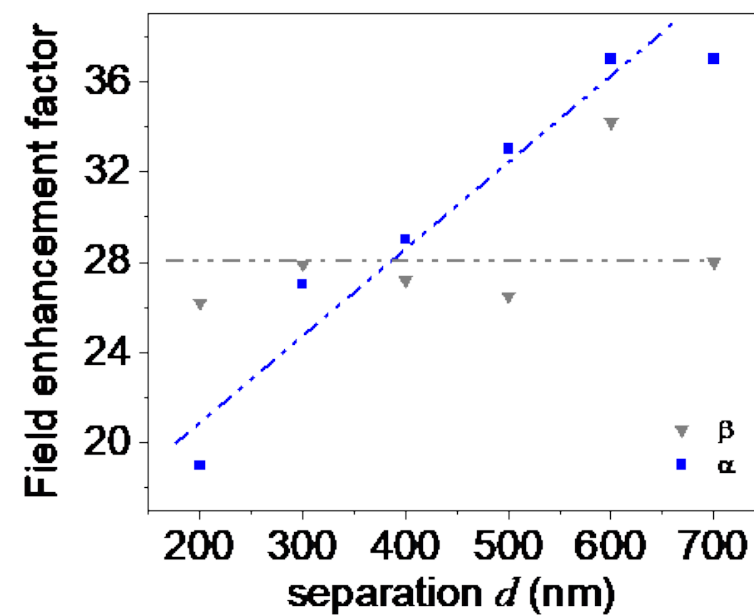

# Figure S6

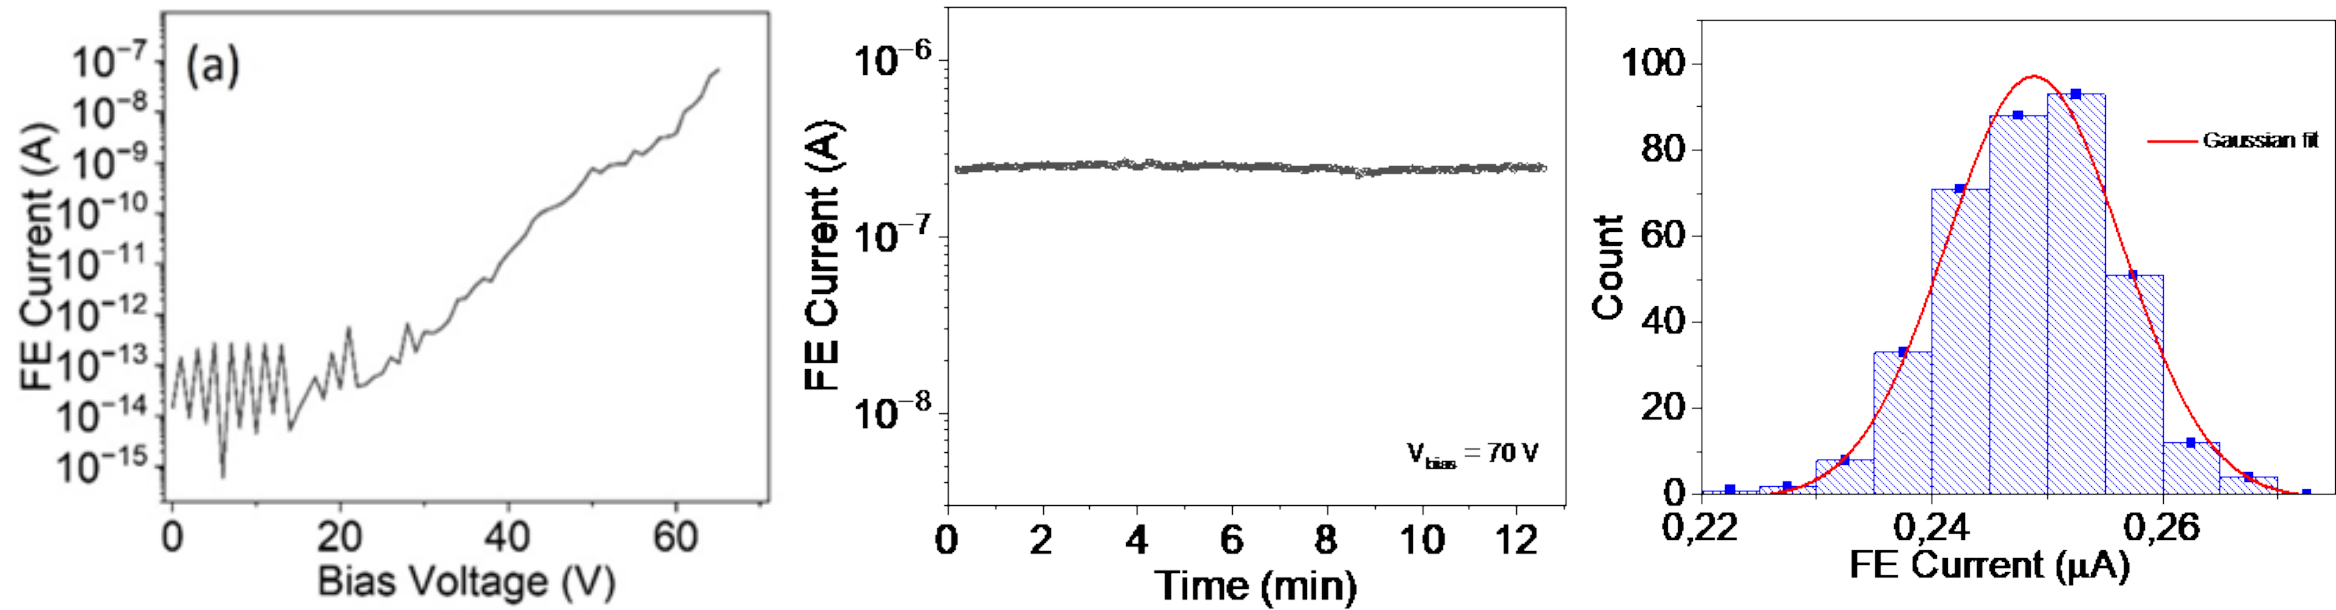

Supplement: d4nr02109f1.pdf [file d4nr02109f1.pdf]
